# Supplementary material for: Microsatellite diversity and broad scale geographic structure in a model legume: building a set of nested core collection for studying naturally occurring variation in Medicago truncatula
Source: PubMed Central journal article supplement (PMC1762007; doi:10.1186/1471-2229-6-28), 2006-12-13
Supplement: 1471-2229-6-28-S1.pdf [file 1471-2229-6-28-S1.pdf]

Table S1

| <b>Sample number</b> | <b>Accession number</b> | <b>Original population name</b> | <b>Stock center</b> | <b>Origin</b> | <b>Latitude</b> | <b>Longitude</b> |
|----------------------|-------------------------|---------------------------------|---------------------|---------------|-----------------|------------------|
| 1                    | L00043                  | SA.09356                        | SARDI               | Algeria       | 36.650          | -7.417           |
| 2                    | L00044                  | SA.09456                        | SARDI               | Tunisia       | 34.750          | -10.717          |
| 3                    | L00045                  | SA.09596                        | SARDI               | Tunisia       | 35.083          | -8.667           |
| 4                    | L00046                  | SA.09642                        | SARDI               | Algeria       | 36.183          | -5.467           |
| 5                    | L00047                  | SA.09670                        | SARDI               | Algeria       | 34.833          | 1.350            |
| 6                    | L00048                  | SA.09693                        | SARDI               | Tunisia       | 36.000          | -9.333           |
| 7                    | L00049                  | SA.09707                        | SARDI               | Tunisia       | 36.000          | -8.000           |
| 8                    | L00052                  | SA.09710                        | SARDI               | Tunisia       | 35.750          | -8.517           |
| 9                    | L00053                  | SA.09712                        | SARDI               | Tunisia       | 35.750          | -8.517           |
| 10                   | L00054                  | SA.19995                        | SARDI               | Cyprus        | 34.000          | -32.000          |
| 11                   | L00057                  | SA.09700                        | SARDI               | Tunisia       | 36.350          | -9.617           |
| 12                   | L00059                  | SA.09649                        | SARDI               | Algeria       | 35.433          | -6.250           |
| 13                   | L00060                  | SA.09434                        | SARDI               | Tunisia       | 35.833          | -9.200           |
| 14                   | L00061                  | SA.09357                        | SARDI               | Algeria       | 36.650          | -7.417           |
| 15                   | L00126                  | SA.11959                        | SARDI               | Israel        | 33.000          | -35.000          |
| 16                   | L00130                  | SA.12451                        | SARDI               | Italy         | 39.117          | -8.933           |
| 17                   | L00132                  | SA.10481                        | SARDI               | Tunisia       | 36.833          | -10.217          |
| 18                   | L00134                  | SA.19998                        | SARDI               | Cyprus        | 34.733          | -33.167          |
| 19                   | L00139                  | SA.15268                        | SARDI               | Algeria       | 35.000          | 0.650            |
| 20                   | L00144                  | SA.14163                        | SARDI               | Jordan        | 32.000          | -35.000          |
| 21                   | L00145                  | SA.21932                        | SARDI               | Algeria       | 36.300          | -6.550           |
| 22                   | L00146                  | SA.19964                        | SARDI               | Turkey        | 37.883          | -28.500          |
| 23                   | L00147                  | SA.19983                        | SARDI               | Cyprus        | 34.667          | -33.083          |
| 24                   | L00148                  | SA.21819                        | SARDI               | Cyprus        | 34.700          | -33.050          |
| 25                   | L00153                  | SA.17562                        | SARDI               | Greece        | 35.167          | -25.033          |
| 26                   | L00154                  | SA.24714                        | SARDI               | Italy         | 37.533          | -14.517          |
| 27                   | L00157                  | SA.27138                        | SARDI               | Greece        | 37.933          | -22.917          |
| 28                   | L00161                  | SA.21362                        | SARDI               | Libya         | 31.417          | -15.250          |
| 29                   | L00162                  | SA.21590                        | SARDI               | Libya         | 31.250          | -16.033          |
| 30                   | L00163                  | SA.22322                        | SARDI               | Syria         | 35.017          | -37.100          |
| 31                   | L00165                  | SA.25226                        | SARDI               | Italy         | 37.133          | -14.917          |
| 32                   | L00166                  | SA.25654                        | SARDI               | Morocco       | 33.883          | 5.617            |
| 33                   | L00167                  | SA.27176                        | SARDI               | Greece        | 38.483          | -22.500          |
| 34                   | L00168                  | SA.25898                        | SARDI               | Italy         | 39.133          | -9.533           |
| 35                   | L00170                  | SA.27774                        | SARDI               | Morocco       | 33.083          | 7.617            |
| 36                   | L00172                  | SA.27185                        | SARDI               | Italy         | 41.300          | -17.783          |
| 37                   | L00173                  | SA.27778                        | SARDI               | Morocco       | 32.550          | 7.683            |
| 38                   | L00174                  | SA.28064                        | SARDI               | Cyprus        | 34.783          | -33.167          |
| 39                   | L00177                  | SA.28095                        | SARDI               | Cyprus        | 34.650          | -33.767          |
| 40                   | L00178                  | SA.28097                        | SARDI               | Cyprus        | 34.000          | -33.000          |
| 41                   | L00179                  | SA.28889                        | SARDI               | France        | 41.600          | -8.083           |
| 42                   | L00180                  | SA.28890                        | SARDI               | France        | 41.717          | -8.783           |
| 43                   | L00181                  | SA.28339                        | SARDI               | Spain         | 37.067          | 5.083            |
| 44                   | L00188                  | SA.31442                        | SARDI               | Morocco       | 33.533          | 6.267            |
| 45                   | L00192                  | SA.30740                        | SARDI               | Romania       | 44.467          | -26.500          |
| 46                   | L00195                  | SA.30199                        | SARDI               | South Africa  | -34.083         | -20.917          |

|    |        |          |       |              |         |          |
|----|--------|----------|-------|--------------|---------|----------|
| 47 | L00197 | SA.30203 | SARDI | South Africa | -34.000 | -20.000  |
| 48 | L00198 | SA.09048 | SARDI | Libya        | 32.200  | -20.550  |
| 49 | L00201 | SA.03047 | SARDI | Portugal     | 38.867  | 7.283    |
| 50 | L00202 | SA.02840 | SARDI | Cyprus       | 35.000  | -33.000  |
| 51 | L00203 | SA.02831 | SARDI | Spain        | 38.100  | 3.767    |
| 52 | L00204 | SA.01489 | SARDI | Israel       | 32.683  | -35.400  |
| 53 | L00207 | SA.09970 | SARDI | Tunisia      | 35.083  | -8.667   |
| 54 | L00211 | SA.31443 | SARDI | Morocco      | 33.083  | 7.583    |
| 55 | L00212 | SA.28375 | SARDI | Portugal     | 37.067  | 8.800    |
| 56 | L00213 | SA.27882 | SARDI | Morocco      | 33.083  | 6.667    |
| 57 | L00214 | SA.28110 | SARDI | Cyprus       | 34.950  | -34.083  |
| 58 | L00215 | SA.28099 | SARDI | Cyprus       | 34.000  | -33.000  |
| 59 | L00216 | SA.27961 | SARDI | Morocco      | 31.833  | 6.933    |
| 60 | L00217 | SA.28089 | SARDI | Cyprus       | 34.900  | -33.617  |
| 61 | L00218 | SA.27942 | SARDI | Morocco      | 33.650  | 7.167    |
| 62 | L00219 | SA.27192 | SARDI | Italy        | 41.300  | -17.783  |
| 63 | L00221 | SA.25926 | SARDI | Italy        | 39.100  | -9.533   |
| 64 | L00222 | SA.25915 | SARDI | Italy        | 39.000  | -9.000   |
| 65 | L00223 | SA.25664 | SARDI | Morocco      | 34.000  | 6.000    |
| 66 | L00224 | SA.27159 | SARDI | Greece       | 37.933  | -22.917  |
| 67 | L00225 | SA.21560 | SARDI | Libya        | 31.417  | -15.483  |
| 68 | L00226 | SA.25941 | SARDI | Italy        | 39.000  | -9.000   |
| 69 | L00228 | SA.27063 | SARDI | Greece       | 38.083  | -22.567  |
| 70 | L00229 | SA.27129 | SARDI | Greece       | 37.933  | -22.917  |
| 71 | L00231 | SA.27137 | SARDI | Greece       | 37.933  | -22.917  |
| 72 | L00232 | SA.27062 | SARDI | Greece       | 38.083  | -22.567  |
| 73 | L00233 | SA.24576 | SARDI | Morocco      | 34.083  | 5.000    |
| 74 | L00234 | SA.23859 | SARDI | Tunisia      | 36.417  | -9.250   |
| 75 | L00237 | SA.21302 | SARDI | Libya        | 32.667  | -14.250  |
| 76 | L00238 | SA.22323 | SARDI | Syria        | 35.017  | -37.083  |
| 77 | L00239 | SA.26063 | SARDI | Morocco      | 32.167  | 8.833    |
| 78 | L00241 | SA.15951 | SARDI | Madeira      | 32.667  | 16.917   |
| 79 | L00242 | SA.14829 | SARDI | Algeria      | 35.000  | 0.650    |
| 80 | L00244 | SA.18543 | SARDI | Tunisia      | 35.567  | -8.667   |
| 81 | L00245 | SA.14161 | SARDI | Jordan       | 32.317  | -35.750  |
| 82 | L00246 | SA.12455 | SARDI | Italy        | 39.000  | -8.000   |
| 83 | L00247 | SA.18532 | SARDI | Tunisia      | 35.833  | -9.167   |
| 84 | L00248 | SA.10406 | SARDI | Morocco      | 33.000  | 6.000    |
| 85 | L00258 | SA.02841 | SARDI | Cyprus       | 35.000  | -33.000  |
| 86 | L00263 | SA.03116 | SARDI | Israel       | 32.000  | -35.000  |
| 87 | L00265 | SA.01526 | SARDI | Algeria      | 36.000  | -3.000   |
| 88 | L00267 | SA.02084 | SARDI | Greece       | 37.550  | -25.133  |
| 89 | L00270 | SA.02820 | SARDI | Turkey       | 36.967  | -30.800  |
| 90 | L00274 | SA.03648 | SARDI | Portugal     | 37.150  | 7.550    |
| 91 | L00275 | SA.04947 | SARDI | Australia    | -35.150 | -141.983 |
| 92 | L00276 | SA.07749 | SARDI | Tunisia      | 36.217  | -10.283  |
| 93 | L00277 | SA.03653 | SARDI | Portugal     | 38.733  | 9.133    |
| 94 | L00280 | SA.07763 | SARDI | Tunisia      | 36.217  | -10.283  |
| 95 | L00281 | SA.03562 | SARDI | France       | 43.700  | -7.267   |
| 96 | L00283 | SA.08454 | SARDI | Libya        | 32.500  | -20.833  |
| 97 | L00285 | SA.08916 | SARDI | Algeria      | 36.183  | -5.400   |
| 98 | L00286 | SA.09049 | SARDI | Libya        | 32.483  | -20.833  |

|     |        |          |                  |           |         |          |
|-----|--------|----------|------------------|-----------|---------|----------|
| 99  | L00287 | SA.09062 | SARDI            | Australia | -33.000 | -134.250 |
| 100 | L00288 | SA.09851 | SARDI            | Algeria   | 36.250  | -2.283   |
| 101 | L00289 | SA.09856 | SARDI            | Algeria   | 35.367  | -7.150   |
| 102 | L00290 | SA.09119 | SARDI            | Turkey    | 41.033  | -28.950  |
| 103 | L00292 | SA.09138 | SARDI            | Libya     | 32.500  | -20.833  |
| 104 | L00293 | SA.09137 | SARDI            | Algeria   | 34.833  | 0.167    |
| 105 | L00296 | SA.08642 | SARDI            | Morocco   | 35.667  | 5.867    |
| 106 | L00297 | SA.08626 | SARDI            | Morocco   | 29.717  | 9.600    |
| 107 | L00298 | SA.08618 | SARDI            | Morocco   | 33.783  | 6.833    |
| 108 | L00299 | SA.08619 | SARDI            | Morocco   | 33.667  | 6.667    |
| 109 | L00301 | SA.08601 | SARDI            | Algeria   | 36.183  | -5.400   |
| 110 | L00302 | SA.04087 | SARDI            | Tunisia   | 36.950  | -10.217  |
| 111 | L00303 | SA.08604 | SARDI            | Algeria   | 36.250  | -2.800   |
| 112 | L00305 | SA.08603 | SARDI            | Algeria   | 36.183  | -5.400   |
| 113 | L00306 | SA.08623 | SARDI            | Morocco   | 33.067  | 7.000    |
| 114 | L00307 | SA.08625 | SARDI            | Morocco   | 33.000  | 6.000    |
| 115 | L00308 | SA.09888 | SARDI            | Morocco   | 33.667  | 6.667    |
| 116 | L00309 | SA.08638 | SARDI            | Morocco   | 33.167  | 5.633    |
| 117 | L00310 | SA.09944 | SARDI            | Tunisia   | 35.567  | -8.667   |
| 118 | L00311 | SA.09876 | SARDI            | Algeria   | 36.217  | -2.767   |
| 119 | L00313 | SA.09728 | SARDI            | Tunisia   | 34.750  | -10.717  |
| 120 | L00314 | SA.09866 | SARDI            | Algeria   | 36.650  | -7.417   |
| 121 | L00315 | SA.09820 | SARDI            | Libya     | 32.000  | -20.000  |
| 122 | L00316 | SA.09720 | SARDI            | Tunisia   | 35.567  | -8.667   |
| 123 | L00317 | SA.09715 | SARDI            | Tunisia   | 35.750  | -8.517   |
| 124 | L00321 | SA.03780 | SARDI            | Italy     | 38.100  | -15.650  |
| 125 | L00322 | SA.03749 | SARDI            | Israel    | 32.000  | -35.000  |
| 126 | L00324 | SA.04586 | SARDI            | Tunisia   | 36.000  | -9.000   |
| 127 | L00325 | SA.06088 | SARDI            | Portugal  | 38.733  | 9.133    |
| 128 | L00330 | SA.02806 | SARDI            | Portugal  | 38.867  | 7.283    |
| 129 | L00332 | SA.02748 | SARDI            | Israel    | 32.800  | -35.533  |
| 130 | L00334 | SA.03308 | SARDI            | Australia | -33.633 | -137.917 |
| 131 | L00337 | GRC042   | INRA-Montpellier | Greece    | 37.641  | -23.142  |
| 132 | L00338 | CRE009   | INRA-Montpellier | Greece    | 35.035  | -25.935  |
| 133 | L00339 | CRE006   | INRA-Montpellier | Greece    | 35.062  | -24.962  |
| 134 | L00340 | CRE005   | INRA-Montpellier | Greece    | 35.115  | -24.688  |
| 135 | L00341 | DZA242   | INRA-Montpellier | Algeria   | 35.509  | -6.892   |
| 136 | L00342 | DZA241   | INRA-Montpellier | Algeria   | 35.487  | -6.478   |
| 137 | L00343 | DZA236   | INRA-Montpellier | Algeria   | 36.014  | -6.567   |
| 138 | L00344 | DZA231   | INRA-Montpellier | Algeria   | 36.108  | -4.944   |
| 139 | L00345 | DZA230   | INRA-Montpellier | Algeria   | 36.191  | -5.383   |
| 140 | L00346 | DZA230   | INRA-Montpellier | Algeria   | 36.191  | -5.383   |
| 141 | L00348 | DZA202   | INRA-Montpellier | Algeria   | 35.221  | -0.121   |
| 142 | L00350 | DZA215   | INRA-            | Algeria   | 34.916  | -1.527   |

|     |        |        |                  |          |        |         |
|-----|--------|--------|------------------|----------|--------|---------|
|     |        |        | Montpellier      |          |        |         |
| 143 | L00351 | DZA213 | INRA-Montpellier | Algeria  | 35.320 | -1.500  |
| 144 | L00352 | DZA212 | INRA-Montpellier | Algeria  | 35.392 | -1.348  |
| 145 | L00353 | DZA212 | INRA-Montpellier | Algeria  | 35.392 | -1.348  |
| 146 | L00354 | DZA210 | INRA-Montpellier | Algeria  | 35.857 | -2.039  |
| 147 | L00355 | DZA210 | INRA-Montpellier | Algeria  | 35.857 | -2.039  |
| 148 | L00356 | DZA202 | INRA-Montpellier | Algeria  | 35.221 | -0.121  |
| 149 | L00357 | DZA202 | INRA-Montpellier | Algeria  | 35.221 | -0.121  |
| 150 | L00358 | DZA061 | INRA-Montpellier | Algeria  | 36.500 | -7.404  |
| 151 | L00359 | DZA059 | INRA-Montpellier | Algeria  | 36.203 | -7.939  |
| 152 | L00360 | DZA058 | INRA-Montpellier | Algeria  | 36.140 | -7.944  |
| 153 | L00361 | DZA046 | INRA-Montpellier | Algeria  | 36.977 | -7.551  |
| 154 | L00362 | DZA045 | INRA-Montpellier | Algeria  | 36.923 | -7.736  |
| 155 | L00363 | DZA045 | INRA-Montpellier | Algeria  | 36.923 | -7.736  |
| 156 | L00364 | DZA033 | INRA-Montpellier | Algeria  | 36.509 | -5.394  |
| 157 | L00365 | DZA033 | INRA-Montpellier | Algeria  | 36.509 | -5.394  |
| 158 | L00366 | DZA022 | INRA-Montpellier | Algeria  | 36.355 | -5.428  |
| 159 | L00367 | DZA016 | INRA-Montpellier | Algeria  | 36.279 | -3.567  |
| 160 | L00369 | PRT180 | INRA-Montpellier | Portugal | 37.193 | 8.887   |
| 161 | L00370 | PRT179 | INRA-Montpellier | Portugal | 37.075 | 8.800   |
| 162 | L00371 | PRT178 | INRA-Montpellier | Portugal | 37.206 | 8.488   |
| 163 | L00372 | PRT177 | INRA-Montpellier | Portugal | 37.190 | 8.081   |
| 164 | L00373 | PRT176 | INRA-Montpellier | Portugal | 37.153 | 7.726   |
| 165 | L00374 | PRT176 | INRA-Montpellier | Portugal | 37.153 | 7.726   |
| 166 | L00375 | GRC098 | INRA-Montpellier | Greece   | 38.203 | -22.138 |
| 167 | L00376 | GRC093 | INRA-Montpellier | Greece   | 38.347 | -22.356 |
| 168 | L00379 | GRC063 | INRA-Montpellier | Greece   | 40.159 | -23.732 |
| 169 | L00380 | GRC063 | INRA-Montpellier | Greece   | 40.159 | -23.732 |
| 170 | L00381 | GRC052 | INRA-Montpellier | Greece   | 39.242 | -23.228 |
| 171 | L00383 | GRC040 | INRA-Montpellier | Greece   | 37.596 | -23.011 |

|     |        |        |                  |         |        |         |
|-----|--------|--------|------------------|---------|--------|---------|
| 172 | L00384 | GRC037 | INRA-Montpellier | Greece  | 37.023 | -22.534 |
| 173 | L00385 | GRC033 | INRA-Montpellier | Greece  | 36.915 | -22.500 |
| 174 | L00386 | GRC033 | INRA-Montpellier | Greece  | 36.915 | -22.500 |
| 175 | L00387 | GRC024 | INRA-Montpellier | Greece  | 37.723 | -21.874 |
| 176 | L00388 | GRC024 | INRA-Montpellier | Greece  | 37.723 | -21.874 |
| 177 | L00391 | DZA243 | INRA-Montpellier | Algeria | 35.809 | -7.367  |
| 178 | L00392 | DZA242 | INRA-Montpellier | Algeria | 35.509 | -6.892  |
| 179 | L00393 | DZA244 | INRA-Montpellier | Algeria | 35.905 | -7.178  |
| 180 | L00394 | DZA243 | INRA-Montpellier | Algeria | 35.809 | -7.367  |
| 181 | L00395 | DZA309 | INRA-Montpellier | Algeria | 34.803 | 1.674   |
| 182 | L00396 | DZA246 | INRA-Montpellier | Algeria | 36.302 | -7.150  |
| 183 | L00397 | DZA323 | INRA-Montpellier | Algeria | 35.633 | 0.874   |
| 184 | L00398 | DZA312 | INRA-Montpellier | Algeria | 35.194 | 0.352   |
| 185 | L00400 | DZA323 | INRA-Montpellier | Algeria | 35.633 | 0.874   |
| 186 | L00401 | ESP031 | INRA-Montpellier | Spain   | 37.500 | 1.991   |
| 187 | L00403 | ESP040 | INRA-Montpellier | Spain   | 36.737 | 4.333   |
| 188 | L00404 | ESP039 | INRA-Montpellier | Spain   | 36.950 | 4.122   |
| 189 | L00405 | ESP041 | INRA-Montpellier | Spain   | 36.636 | 4.739   |
| 190 | L00406 | ESP040 | INRA-Montpellier | Spain   | 36.737 | 4.333   |
| 191 | L00407 | ESP042 | INRA-Montpellier | Spain   | 36.577 | 4.843   |
| 192 | L00408 | ESP041 | INRA-Montpellier | Spain   | 36.636 | 4.739   |
| 193 | L00409 | ESP045 | INRA-Montpellier | Spain   | 36.449 | 5.442   |
| 194 | L00410 | ESP043 | INRA-Montpellier | Spain   | 36.420 | 5.125   |
| 195 | L00411 | ESP048 | INRA-Montpellier | Spain   | 36.429 | 5.703   |
| 196 | L00412 | ESP048 | INRA-Montpellier | Spain   | 36.429 | 5.703   |
| 197 | L00414 | ESP050 | INRA-Montpellier | Spain   | 37.060 | 5.808   |
| 198 | L00416 | ESP074 | INRA-Montpellier | Spain   | 41.121 | -0.988  |
| 199 | L00417 | ESP095 | INRA-Montpellier | Spain   | 36.986 | 2.914   |
| 200 | L00421 | ESP098 | INRA-Montpellier | Spain   | 37.104 | 4.232   |
| 201 | L00422 | ESP096 | INRA-            | Spain   | 36.982 | 3.142   |

|     |        |        |                  |        |        |        |
|-----|--------|--------|------------------|--------|--------|--------|
|     |        |        | Montpellier      |        |        |        |
| 202 | L00423 | ESP099 | INRA-Montpellier | Spain  | 36.953 | 4.342  |
| 203 | L00424 | ESP098 | INRA-Montpellier | Spain  | 37.082 | 4.236  |
| 204 | L00425 | ESP100 | INRA-Montpellier | Spain  | 37.060 | 4.626  |
| 205 | L00426 | ESP100 | INRA-Montpellier | Spain  | 37.060 | 4.626  |
| 206 | L00427 | ESP103 | INRA-Montpellier | Spain  | 37.728 | 4.854  |
| 207 | L00428 | ESP101 | INRA-Montpellier | Spain  | 37.083 | 5.096  |
| 208 | L00429 | ESP104 | INRA-Montpellier | Spain  | 37.946 | 4.525  |
| 209 | L00430 | ESP104 | INRA-Montpellier | Spain  | 37.946 | 4.525  |
| 210 | L00431 | ESP155 | INRA-Montpellier | Spain  | 37.534 | 5.964  |
| 211 | L00432 | ESP140 | INRA-Montpellier | Spain  | 42.612 | 1.816  |
| 212 | L00434 | ESP156 | INRA-Montpellier | Spain  | 37.641 | 5.748  |
| 213 | L00435 | ESP161 | INRA-Montpellier | Spain  | 37.348 | 4.384  |
| 214 | L00436 | ESP160 | INRA-Montpellier | Spain  | 37.418 | 4.419  |
| 215 | L00437 | ESP163 | INRA-Montpellier | Spain  | 36.989 | 4.285  |
| 216 | L00438 | ESP162 | INRA-Montpellier | Spain  | 37.245 | 4.315  |
| 217 | L00439 | ESP169 | INRA-Montpellier | Spain  | 36.075 | 5.668  |
| 218 | L00440 | ESP163 | INRA-Montpellier | Spain  | 36.989 | 4.285  |
| 219 | L00441 | ESP172 | INRA-Montpellier | Spain  | 36.819 | 6.059  |
| 220 | L00442 | ESP170 | INRA-Montpellier | Spain  | 36.261 | 5.946  |
| 221 | L00443 | ESP174 | INRA-Montpellier | Spain  | 37.333 | 6.761  |
| 222 | L00444 | ESP178 | INRA-Montpellier | Spain  | 37.391 | 6.233  |
| 223 | L00445 | ESP175 | INRA-Montpellier | Spain  | 37.284 | 7.122  |
| 224 | L00446 | ESP174 | INRA-Montpellier | Spain  | 37.333 | 6.761  |
| 225 | L00447 | F11007 | INRA-Montpellier | France | 42.590 | -2.570 |
| 226 | L00448 | ESP175 | INRA-Montpellier | Spain  | 37.284 | 7.122  |
| 227 | L00449 | F11012 | INRA-Montpellier | France | 43.000 | -2.440 |
| 228 | L00450 | F11008 | INRA-Montpellier | France | 42.550 | -2.560 |
| 229 | L00451 | F11013 | INRA-Montpellier | France | 43.090 | -2.520 |
| 230 | L00454 | F20009 | INRA-Montpellier | France | 42.940 | -9.457 |

|     |        |          |                  |          |        |        |
|-----|--------|----------|------------------|----------|--------|--------|
| 231 | L00455 | F20025   | INRA-Montpellier | France   | 42.756 | -9.451 |
| 232 | L00456 | F20015   | INRA-Montpellier | France   | 42.084 | -9.369 |
| 233 | L00457 | F20026   | INRA-Montpellier | France   | 42.924 | -9.357 |
| 234 | L00458 | F20025   | INRA-Montpellier | France   | 42.756 | -9.451 |
| 235 | L00460 | F20026   | INRA-Montpellier | France   | 42.924 | -9.357 |
| 236 | L00461 | F20031   | INRA-Montpellier | France   | 42.182 | -9.377 |
| 237 | L00463 | F20058   | INRA-Montpellier | France   | 41.405 | -9.127 |
| 238 | L00464 | F20048   | INRA-Montpellier | France   | 42.283 | -9.521 |
| 239 | L00465 | F20061   | INRA-Montpellier | France   | 42.183 | -9.395 |
| 240 | L00467 | F20069   | INRA-Montpellier | France   | 42.592 | -8.908 |
| 241 | L00468 | F20069   | INRA-Montpellier | France   | 42.592 | -8.908 |
| 242 | L00469 | F20086   | INRA-Montpellier | France   | 42.812 | -9.459 |
| 243 | L00470 | F20081   | INRA-Montpellier | France   | 42.401 | -9.504 |
| 244 | L00471 | Jemalong | SARDI            | cultivar |        |        |
| 245 | L00472 | F20087   | INRA-Montpellier | France   | 42.902 | -9.470 |
| 246 | L00473 | Cyprus   | SARDI            | cultivar |        |        |
| 247 | L00475 | DZA016   | INRA-Montpellier | Algeria  | 36.279 | -3.567 |
| 248 | L00476 | DZA016   | INRA-Montpellier | Algeria  | 36.279 | -3.567 |
| 249 | L00477 | DZA058   | INRA-Montpellier | Algeria  | 36.140 | -7.944 |
| 250 | L00478 | DZA055   | INRA-Montpellier | Algeria  | 36.005 | -8.112 |
| 251 | L00479 | DZA061   | INRA-Montpellier | Algeria  | 36.500 | -7.404 |
| 252 | L00480 | DZA058   | INRA-Montpellier | Algeria  | 36.140 | -7.944 |
| 253 | L00481 | DZA213   | INRA-Montpellier | Algeria  | 35.320 | -1.500 |
| 254 | L00482 | ESP095   | INRA-Montpellier | Spain    | 36.986 | 2.914  |
| 255 | L00487 | DZA230   | INRA-Montpellier | Algeria  | 36.191 | -5.383 |
| 256 | L00488 | DZA230   | INRA-Montpellier | Algeria  | 36.191 | -5.383 |
| 257 | L00489 | DZA233   | INRA-Montpellier | Algeria  | 35.847 | -4.951 |
| 258 | L00490 | DZA231   | INRA-Montpellier | Algeria  | 36.108 | -4.944 |
| 259 | L00491 | DZA241   | INRA-Montpellier | Algeria  | 35.487 | -6.478 |
| 260 | L00492 | DZA236   | INRA-Montpellier | Algeria  | 36.014 | -6.567 |
| 261 | L00493 | DZA243   | INRA-            | Algeria  | 35.809 | -7.367 |

|     |        |          |                  |          |        |         |
|-----|--------|----------|------------------|----------|--------|---------|
|     |        |          | Montpellier      |          |        |         |
| 262 | L00494 | DZA241   | INRA-Montpellier | Algeria  | 35.487 | -6.478  |
| 263 | L00495 | DZA312   | INRA-Montpellier | Algeria  | 35.194 | 0.352   |
| 264 | L00496 | DZA246   | INRA-Montpellier | Algeria  | 36.302 | -7.150  |
| 265 | L00497 | DZA323   | INRA-Montpellier | Algeria  | 35.633 | 0.874   |
| 266 | L00503 | ESP080   | INRA-Montpellier | Spain    | 40.441 | -0.176  |
| 267 | L00508 | ESP095   | INRA-Montpellier | Spain    | 36.986 | 2.914   |
| 268 | L00509 | ESP104   | INRA-Montpellier | Spain    | 37.946 | 4.525   |
| 269 | L00510 | ESP098   | INRA-Montpellier | Spain    | 37.104 | 4.232   |
| 270 | L00511 | ESP161   | INRA-Montpellier | Spain    | 37.348 | 4.384   |
| 271 | L00512 | ESP155   | INRA-Montpellier | Spain    | 37.534 | 5.964   |
| 272 | L00513 | ESP163   | INRA-Montpellier | Spain    | 36.989 | 4.285   |
| 273 | L00514 | ESP163   | INRA-Montpellier | Spain    | 36.989 | 4.285   |
| 274 | L00516 | ESP172   | INRA-Montpellier | Spain    | 36.819 | 6.059   |
| 275 | L00517 | F20015   | INRA-Montpellier | France   | 42.084 | -9.369  |
| 276 | L00520 | F20015   | INRA-Montpellier | France   | 42.084 | -9.369  |
| 277 | L00522 | F83005   | INRA-Montpellier | France   | 43.330 | -6.140  |
| 278 | L00523 | PRT176   | INRA-Montpellier | Portugal | 37.153 | 7.726   |
| 279 | L00525 | PRT176   | INRA-Montpellier | Portugal | 37.153 | 7.726   |
| 280 | L00526 | PRT179   | INRA-Montpellier | Portugal | 37.075 | 8.800   |
| 281 | L00527 | Borong   | SARDI            | cultivar |        |         |
| 282 | L00528 | Caliph   | SARDI            | cultivar |        |         |
| 283 | L00529 | Cyprus   | SARDI            | cultivar |        |         |
| 284 | L00530 | F83005   | INRA-Montpellier | France   | 43.330 | -6.140  |
| 285 | L00531 | F83005   | INRA-Montpellier | France   | 43.330 | -6.140  |
| 286 | L00535 | Paraggio | SARDI            | cultivar |        |         |
| 287 | L00536 | Sephi    | SARDI            | cultivar |        |         |
| 288 | L00537 | CRE007   | INRA-Montpellier | Greece   | 35.066 | -25.364 |
| 289 | L00538 | DZA055   | INRA-Montpellier | Algeria  | 36.005 | -8.112  |
| 290 | L00539 | DZA105   | INRA-Montpellier | Algeria  | 36.883 | -4.534  |
| 291 | L00542 | DZA233   | INRA-Montpellier | Algeria  | 35.847 | -4.951  |
| 292 | L00543 | DZA327   | INRA-Montpellier | Algeria  | 35.252 | 0.703   |



|     |        |        |                  |          |        |         |
|-----|--------|--------|------------------|----------|--------|---------|
| 293 | L00544 | ESP105 | INRA-Montpellier | Spain    | 38.076 | 3.816   |
| 294 | L00545 | ESP158 | INRA-Montpellier | Spain    | 37.529 | 5.023   |
| 295 | L00546 | ESP159 | INRA-Montpellier | Spain    | 37.424 | 4.755   |
| 296 | L00547 | ESP165 | INRA-Montpellier | Spain    | 36.685 | 4.793   |
| 297 | L00548 | ESP171 | INRA-Montpellier | Spain    | 36.388 | 6.113   |
| 298 | L00549 | F11005 | INRA-Montpellier | France   | 43.060 | -3.050  |
| 299 | L00550 | F11013 | INRA-Montpellier | France   | 43.090 | -2.520  |
| 300 | L00551 | F34042 | INRA-Montpellier | France   | 43.400 | -3.460  |
| 301 | L00552 | F20047 | INRA-Montpellier | France   | 42.582 | -9.060  |
| 302 | L00553 | F20061 | INRA-Montpellier | France   | 42.183 | -9.395  |
| 303 | L00554 | F20089 | INRA-Montpellier | France   | 42.971 | -9.367  |
| 304 | L00555 | GRC020 | INRA-Montpellier | Greece   | 38.122 | -21.543 |
| 305 | L00557 | GRC064 | INRA-Montpellier | Greece   | 39.987 | -23.932 |
| 306 | L00566 | CRE007 | INRA-Montpellier | Greece   | 35.066 | -25.364 |
| 307 | L00569 | MOGUL  | SARDI            | cultivar |        |         |
| 308 | L00573 | F34050 | INRA-Montpellier | France   | 43.300 | -3.140  |
| 309 | L00574 | F13006 | INRA-Montpellier | France   | 43.250 | -5.120  |
| 310 | L00575 | DZA012 | INRA-Montpellier | Algeria  | 36.549 | -3.183  |
| 311 | L00590 | DZA212 | INRA-Montpellier | Algeria  | 35.392 | -1.348  |
| 312 | L00598 | DZA243 | INRA-Montpellier | Algeria  | 35.809 | -7.367  |
| 313 | L00600 | DZA244 | INRA-Montpellier | Algeria  | 35.905 | -7.178  |
| 314 | L00601 | DZA246 | INRA-Montpellier | Algeria  | 36.302 | -7.150  |
| 315 | L00610 | ESP095 | INRA-Montpellier | Spain    | 36.986 | 2.914   |
| 316 | L00615 | ESP158 | INRA-Montpellier | Spain    | 37.529 | 5.023   |
| 317 | L00617 | ESP175 | INRA-Montpellier | Spain    | 37.284 | 7.122   |
| 318 | L00620 | F20058 | INRA-Montpellier | France   | 41.405 | -9.127  |
| 319 | L00637 | DZA061 | INRA-Montpellier | Algeria  | 36.500 | -7.404  |
| 320 | L00639 | DZA210 | INRA-Montpellier | Algeria  | 35.857 | -2.039  |
| 321 | L00640 | DZA213 | INRA-Montpellier | Algeria  | 35.320 | -1.500  |
| 322 | L00642 | DZA244 | INRA-Montpellier | Algeria  | 35.905 | -7.178  |

|     |        |        |                  |         |        |         |
|-----|--------|--------|------------------|---------|--------|---------|
| 323 | L00645 | GRC033 | INRA-Montpellier | Greece  | 36.915 | -22.500 |
| 324 | L00647 | F66014 | INRA-Montpellier | France  | 42.490 | -2.560  |
| 325 | L00648 | F66014 | INRA-Montpellier | France  | 42.490 | -2.560  |
| 326 | L00649 | F66014 | INRA-Montpellier | France  | 42.490 | -2.560  |
| 327 | L00650 | F66014 | INRA-Montpellier | France  | 42.490 | -2.560  |
| 328 | L00651 | F66014 | INRA-Montpellier | France  | 42.490 | -2.560  |
| 329 | L00652 | F66014 | INRA-Montpellier | France  | 42.490 | -2.560  |
| 330 | L00654 | DZA014 | INRA-Montpellier | Algeria | 36.475 | -3.311  |
| 331 | L00656 | DZA117 | INRA-Montpellier | Algeria | 37.018 | -7.427  |
| 332 | L00657 | DZA204 | INRA-Montpellier | Algeria | 35.662 | -0.352  |
| 333 | L00659 | DZA211 | INRA-Montpellier | Algeria | 35.536 | -1.676  |
| 334 | L00663 | DZA226 | INRA-Montpellier | Algeria | 35.207 | -5.703  |
| 335 | L00664 | DZA228 | INRA-Montpellier | Algeria | 35.365 | -5.654  |
| 336 | L00665 | DZA247 | INRA-Montpellier | Algeria | 36.347 | -7.211  |
| 337 | L00666 | DZA301 | INRA-Montpellier | Algeria | 34.995 | 0.739   |
| 338 | L00669 | DZA304 | INRA-Montpellier | Algeria | 34.631 | 0.614   |
| 339 | L00673 | DZA319 | INRA-Montpellier | Algeria | 35.288 | 0.571   |
| 340 | L00674 | DZA322 | INRA-Montpellier | Algeria | 35.387 | 0.841   |
| 341 | L00675 | DZA326 | INRA-Montpellier | Algeria | 35.216 | 0.984   |
| 342 | L00676 | DZA328 | INRA-Montpellier | Algeria | 35.284 | 0.791   |
| 343 | L00679 | F66017 | INRA-Montpellier | France  | 42.370 | -2.450  |
| 344 | L00680 | F66018 | INRA-Montpellier | France  | 43.110 | -3.000  |
| 345 | L00734 | DZA315 | INRA-Montpellier | Algeria | 34.716 | -0.158  |
| 346 | L00736 | DZA045 | INRA-Montpellier | Algeria | 36.923 | -7.736  |
