# Supplementary material for: Microsatellite diversity and broad scale geographic structure in a model legume: building a set of nested core collection for studying naturally occurring variation in Medicago truncatula
Source: PubMed Central journal article supplement (PMC1762007; doi:10.1186/1471-2229-6-28), 2006-12-13
Supplement: 1471-2229-6-28-S2.pdf [file 1471-2229-6-28-S2.pdf]

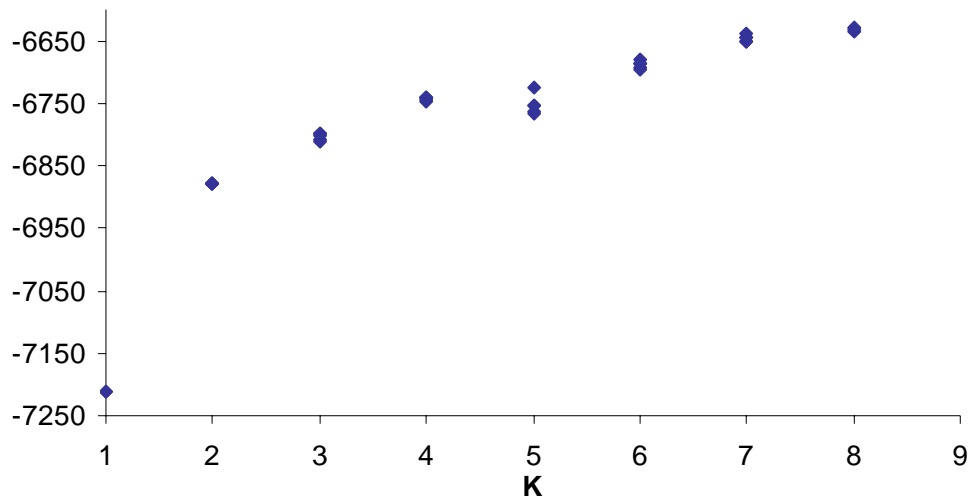

Figure S1: (Log) Likelihood of the data ( $n = 266$ ) as a function of  $K$  (the number of groups used to stratify the sample). For each  $K$  value, 5 independent runs (blue diamonds) were considered.
