# Supplementary material for: Microsatellite diversity and broad scale geographic structure in a model legume: building a set of nested core collection for studying naturally occurring variation in Medicago truncatula
Source: PubMed Central journal article supplement (PMC1762007; doi:10.1186/1471-2229-6-28), 2006-12-13
Supplement: 1471-2229-6-28-S3.pdf [file 1471-2229-6-28-S3.pdf]

Table S2: Composition of clusters obtained for different values of  $K$  ( $n = 266$ ).

|            | cluster composition |                    |                    |                    |                    |                    |                    |                    | Partial membership |
|------------|---------------------|--------------------|--------------------|--------------------|--------------------|--------------------|--------------------|--------------------|--------------------|
| <b>K=2</b> | 0.87<br>(178)<br>5  | 0.86<br>(88)<br>9  |                    |                    |                    |                    |                    |                    | 14                 |
| <b>K=3</b> | 0.65<br>(93)<br>37  | 0.77<br>(78)<br>14 | 0.70<br>(95)<br>36 |                    |                    |                    |                    |                    | 87                 |
| <b>K=4</b> | 0.70<br>(71)<br>24  | 0.72<br>(68)<br>17 | 0.63<br>(85)<br>36 | 0.66<br>(42)<br>15 |                    |                    |                    |                    | 92                 |
| <b>K=5</b> | 0.63<br>(72)<br>18  | 0.64<br>(27)<br>28 | 0.68<br>(61)<br>12 | 0.59<br>(37)<br>38 | 0.59<br>(69)<br>21 |                    |                    |                    | 117                |
| <b>K=6</b> | 0.57<br>(56)<br>37  | 0.65<br>(60)<br>23 | 0.55<br>(31)<br>17 | 0.63<br>(24)<br>10 | 0.60<br>(33)<br>17 | 0.53<br>(62)<br>44 |                    |                    | 148                |
| <b>K=7</b> | 0.53<br>(57)<br>10  | 0.54<br>(64)<br>21 | 0.65<br>(21)<br>8  | 0.62<br>(23)<br>39 | 0.54<br>(52)<br>17 | 0.50<br>(27)<br>36 | 0.58<br>(32)<br>21 |                    | 152                |
| <b>K=8</b> | 0.59<br>(24)<br>11  | 0.58<br>(31)<br>17 | 0.66<br>(19)<br>7  | 0.52<br>(50)<br>33 | 0.34<br>(43)<br>43 | 0.34<br>(18)<br>18 | 0.51<br>(27)<br>15 | 0.62<br>(54)<br>22 | 166                |

Notes: In each table entry, the mean proportion of membership in each cluster, followed by the number of individuals assigned to each cluster (between parentheses) and the number of individuals showing a partial membership in this group ( $p < 0.6$ ) is given.

The last column “partial membership” gives the total number of individuals with partial membership ( $p < 0.6$ ). For each  $K$  value, the results presented correspond to the run yielding the highest posterior probability of the data.
